# Supplementary figures and images for: Macrophagic AMPKα1 orchestrates regenerative inflammation induced by glucocorticoids
Source: PubMed Central journal article supplement — EMBO Rep. 2022 Dec 15;24(2):e55363. doi: 10.15252/embr.202255363 (PMC9900347; doi:10.15252/embr.202255363), 2022-12-15

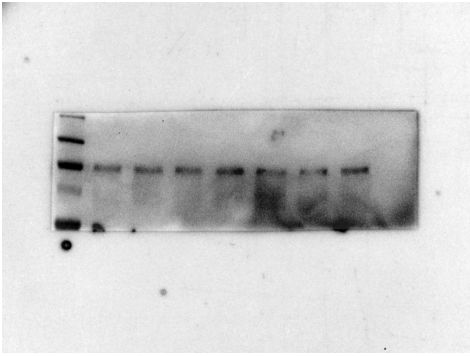

Foxo3 input

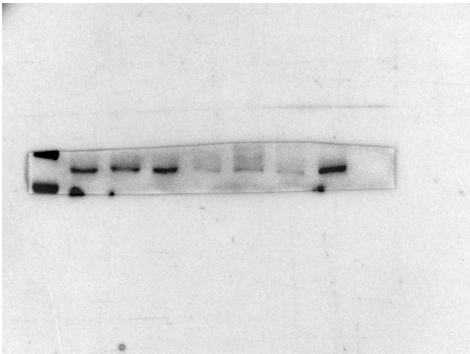

AMPKa1

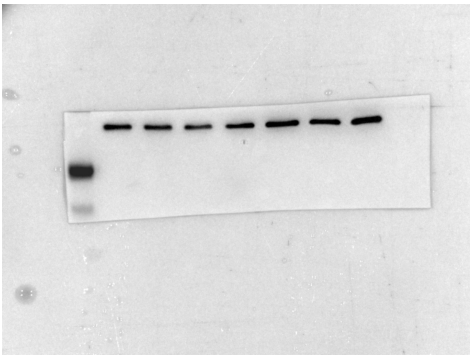

Actin

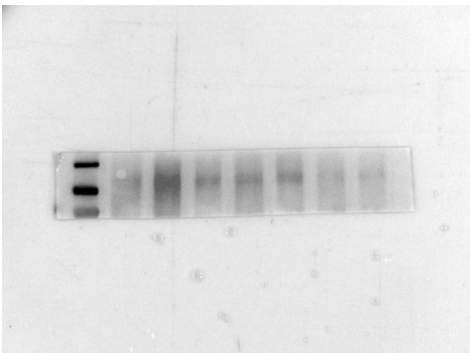

IP Foxo3

Supplement: EMBR-24-e55363-s001.pdf [file EMBR-24-e55363-s001.pdf]
